# Supplementary material
Source: PubMed Central journal article supplement (PMC3705564)
Supplement: NIHMS477528-supplement-cm460681suppdata_pdf.pdf [file NIHMS477528-supplement-cm460681suppdata_pdf.pdf]

**Effects of pulling forces, osmotic pressure, condensing agents, and viscosity on the thermodynamics and kinetics of DNA ejection from bacteriophages to bacterial cells: a computational study**

**(Supplemental Material)**

Anton S. Petrov<sup>1,2</sup>, Scott S. Douglas<sup>3</sup>, and Stephen C. Harvey<sup>1,2,3</sup>

<sup>1</sup>School of Biology, Georgia Institute of Technology, Atlanta, GA 30332

<sup>2</sup>School of Chemistry and Biochemistry, Georgia Institute of Technology, Atlanta, GA 30332

<sup>3</sup>School of Physics, Georgia Institute of Technology, Atlanta, GA 30332

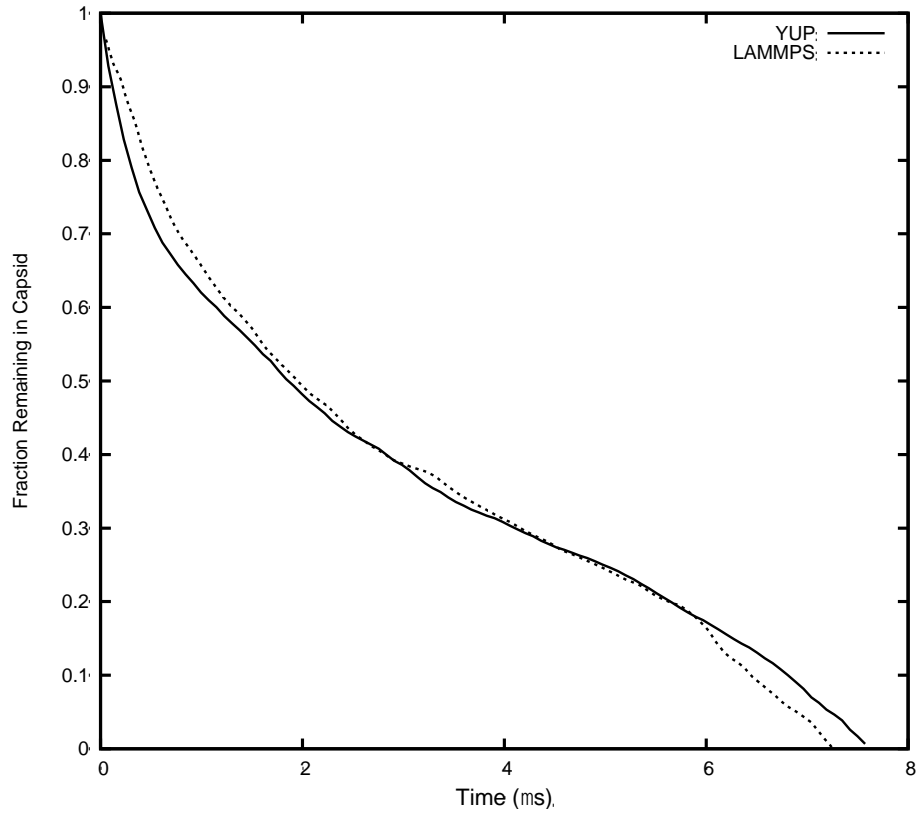

**Figure 1S:** Comparison of a fixed-viscosity ( $\gamma=10^{-3}$ ) ejection run in our YUP implementation and in our LAMMPS implementation. For our purposes, the two implementations yield equivalent results.

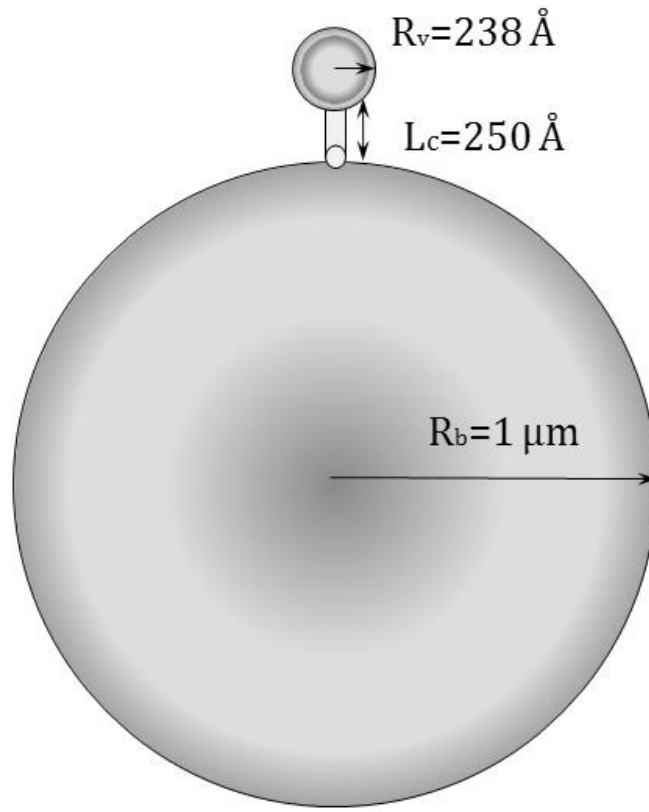

**Figure 2S.** A schematic description of the model used in the ejection simulations. A spherical capsid of radius,  $R_c = 238 \text{ \AA}$  is connected to the cell by a cylindrical channel of length  $L_c = 250 \text{ \AA}$  (50  $\text{\AA}$  of which penetrates inside the capsid), and a bacterial cell modeled as a sphere with a radius  $R_b = 1 \mu\text{m}$ .

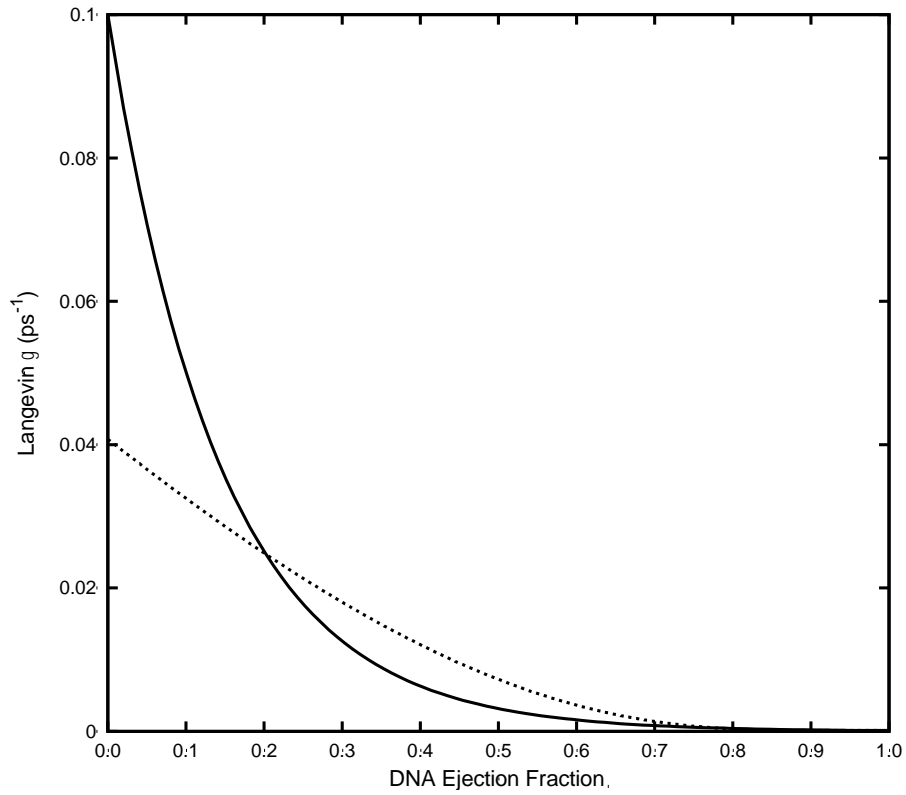

**Figure 3S:** Comparison of radical (dotted line) and semilogarithmic (solid line) functionals for a Langevin collision frequency with  $\gamma_{\text{high}}=10^{-2} \text{ ps}^{-1}$  and  $\gamma_{\text{low}}=10^{-4} \text{ ps}^{-1}$  calculated according Eqn. 4 and Eqn. 5. The scaling factor in the exponent of the radical functional was selected such that the starting  $\gamma$  inside the capsid was within a factor of  $\sim 2$  of  $\gamma_{\text{high}}$ .

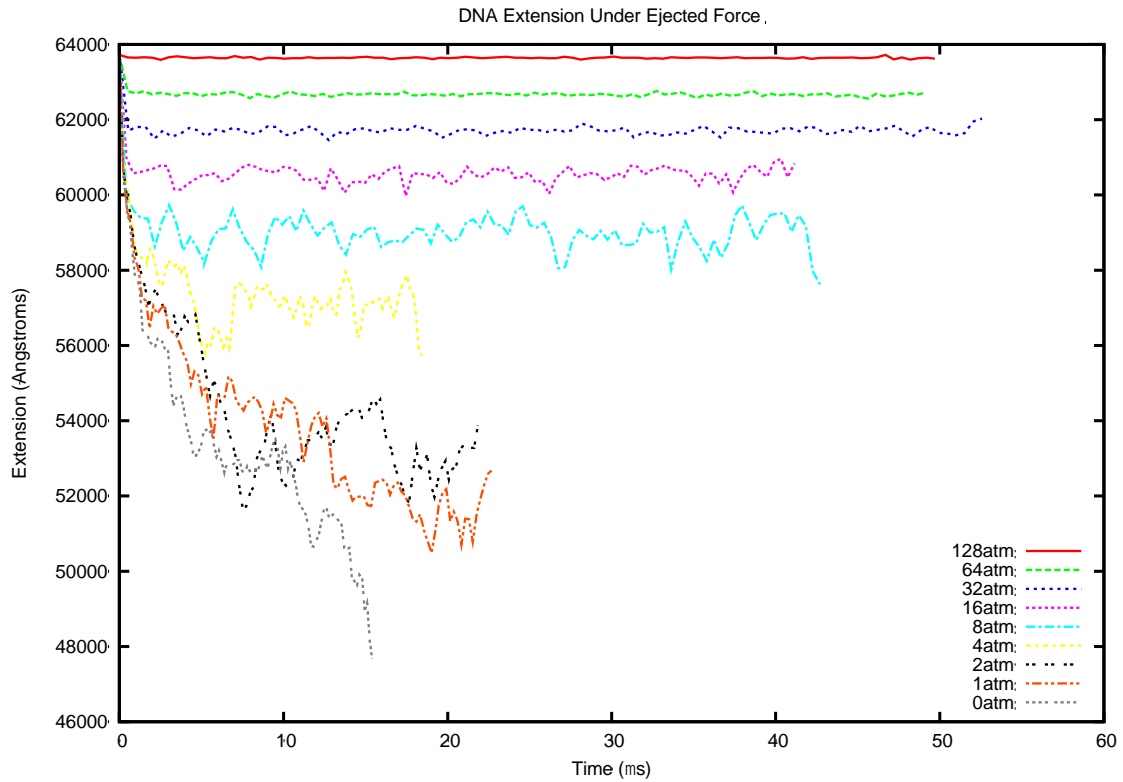

**Figure 4S:** Simulated DNA extension under “ejected” force (total force equally distributed among all pseudoatoms in the DNA chain; 1atm is equivalent to 1pN force). On the timescale of these simulations (larger than the timescale of ejection), the DNA straightens out at ~4atm.

#### Derivation of Equation 4

The DNA within the viral capsid can be idealized as hexagonally packed structures. The cross-sectional area of  $s$  DNA strands organized in such fashion is a 2D array of circles with a hexagonal symmetry. The fraction of packed DNA,  $F$ , equals the ratio of the instantaneous 2D density of these circles  $\rho$  to the fully-packed 2D density of circles  $\rho_0$  as illustrated in the diagram below.

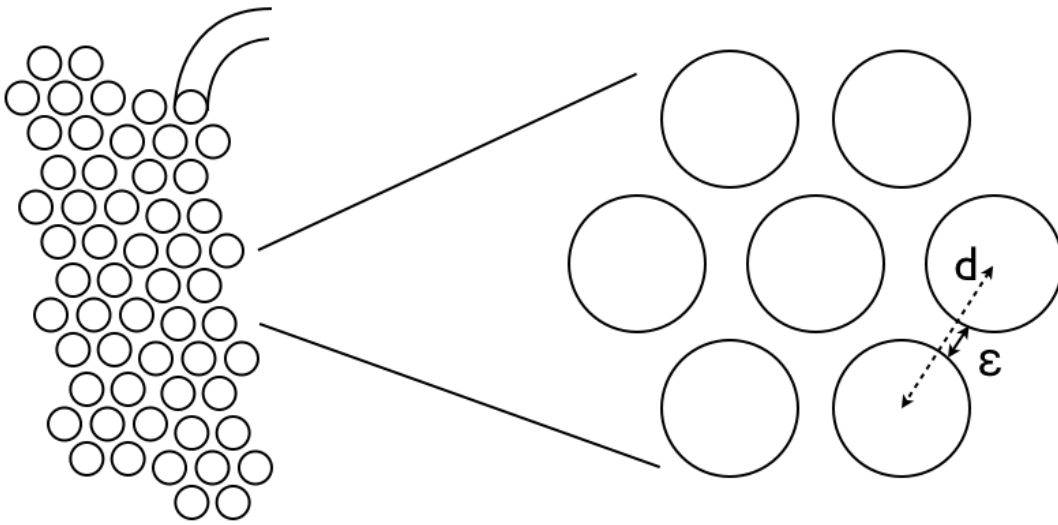

The average 2D density of the coils varies inversely with the square of the coils' center-center distance, so we have

$$F = \frac{\rho}{\rho_0} = \frac{d_0^2}{d^2},$$

By convention, we measure the fraction  $P$  of ejected DNA,  $P = 1 - F$ . Assuming uniform coil density, the average surface-surface distance between the coils  $\varepsilon$  is given by

$$\varepsilon = d - 2r = d_0(1 - P)^{-\frac{1}{2}} - 2r.$$

Assuming that the viscosity of the water depends exponentially on the distance between DNA surfaces in the packed capsid (as suggested by studies of Riedo

and co-workers[1]), the dependence of the collision frequency parameter on the distance between the DNA strands becomes:

$$\gamma_{in} = \gamma_{high} * \exp\left(-0.15 * \left[(1 - f_{eject})^{-0.5} * d_{DNA,0} - d_{DNA}\right]\right) + \gamma_{low},$$

where  $\gamma_{in}$  is the Langevin collision frequency inside the viral capsid,  $\gamma_{out} = \gamma_{low}$  is the Langevin collision frequency in the cell medium,  $d_{DNA,0}$  is the center-center distance (28 Å) of DNA in a fully-packed capsid, and  $d_{DNA}$  (22 Å) is twice the radius of our DNA chain. The factor -0.15 was chosen empirically such that  $\gamma_{in}$  was within a factor of 2 of  $\gamma_{high}$  when ejection began.  $\gamma_{high}$  and  $\gamma_{low}$  were varied for each run.

Note that the segments of DNA do not actually spread monotonically throughout the capsid during ejection; rather, they tend to press against the walls, leaving a hollow region in the center of the capsid. The derivation above is meant only to provide a useful (though not necessarily rigorous) physical model for a new viscosity functional.

1 Li, T. D.; Gao, J. P.; Szoszkiewicz, R.; Landman, U.; Riedo, E. *Phys Rev B* **2007**, 75
